# Supplementary material for: Smart bionic applications based on a multiple stimulus response GO-PDANP/PDMS bilayer flexible actuator
Source: Royal Society of Chemistry journal article supplement (doi:10.1039/d3nj04471h), 2023-01-01
Supplement: d3nj04471h4.pdf [file d3nj04471h4.pdf]

## Smart bionic applications based on multiple stimulus response GO-PDANPs/PDMS bilayer flexible actuators

Song He <sup>\*1</sup>, Chunxiang He, Xinyu Liu, Chunhua Du, Xin Jin, Qilin Chen, Ping Li <sup>\*2</sup>

School of Safety Science and Emergency Management, Wuhan University of  
Technology, 122 Luoshi Road, Wuhan, 430070, P.R. China

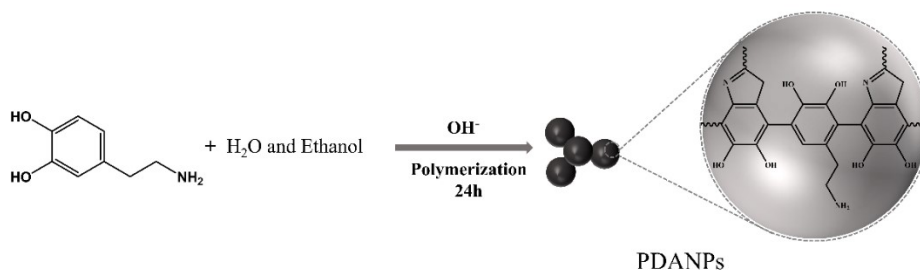

Fig. S1 Schematic diagram of the process of preparing PDNNPs by self-polymerization method

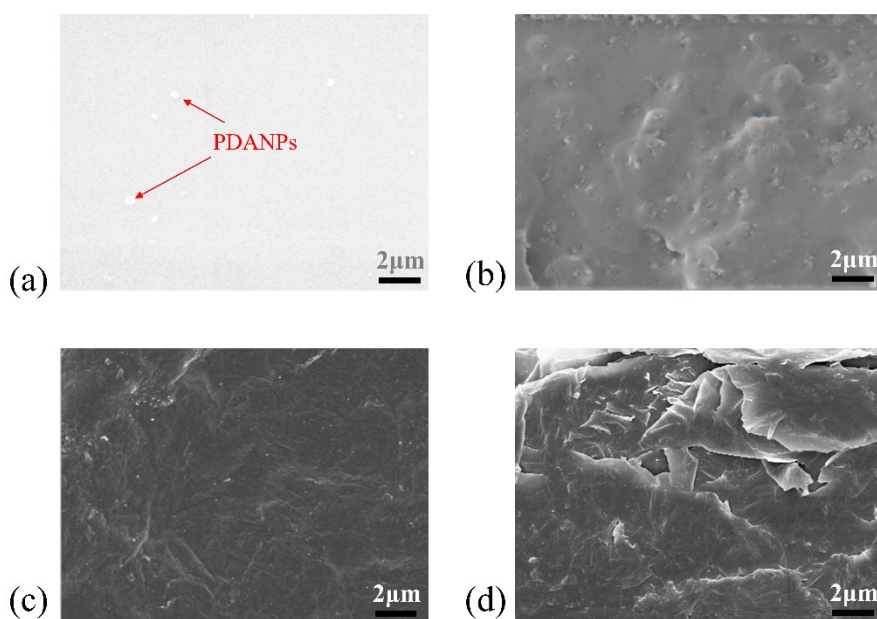

Fig. S2 Morphological characterization of both sides of GO-PDANPs/PDMS BFA. (a) Surface and (b) cross-sectional morphology of PDANPs/PDMS layers. (c) Surface and (d) cross-sectional morphology of the GO layer

<sup>\*1</sup> Corresponding author. E-mail: [hsong@whut.edu.cn](mailto:hsong@whut.edu.cn) (Song He)

<sup>\*2</sup> Corresponding author. E-mail: [vera53@whut.edu.cn](mailto:vera53@whut.edu.cn) (Ping Li)

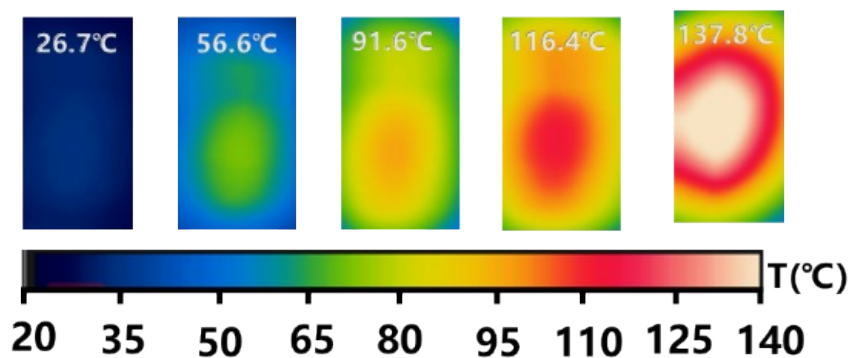

Fig. S3 Surface thermography of GO-PDANPs/PDMS BFA under near-infrared light irradiation

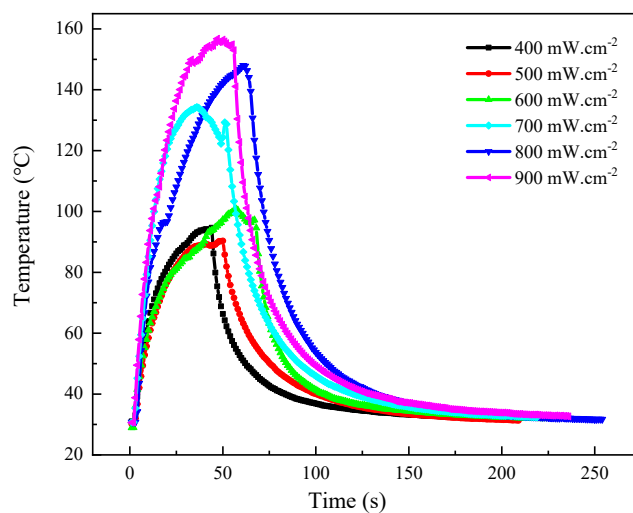

Fig. S4 Surface temperature versus time curve of GO-PDANPs/PDMS BFA under different NIR optical power density irradiation

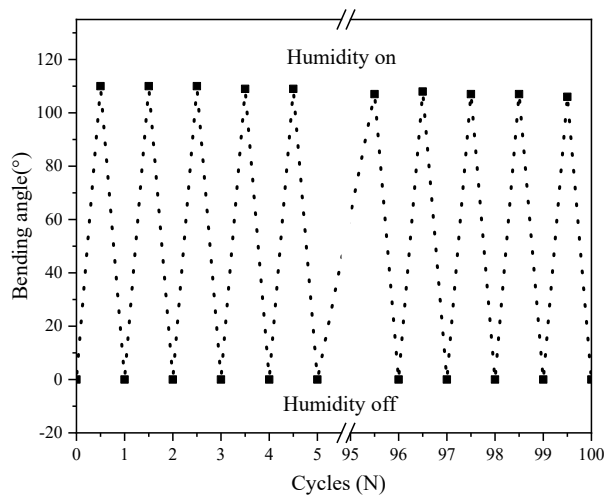

Fig.S5 Cyclic test of GO-PDANPs/PDMS BFA under humidity stimuli.

---

## Reference:

- [1] Yang, L., Cui, J., Zhang, L., Xu, X., Chen, X., Sun, D. A Moisture-Driven Actuator Based on Polydopamine-Modified MXene/Bacterial Cellulose Nanofiber Composite Film. *Adv. Funct. Mater.* 2021, 31, 2101378.
- [2] Qiu Y, Wang M, Zhang W, Liu Y, Li YV, Pan K. An asymmetric graphene oxide film for developing moisture actuators. *Nanoscale.* 2018;10(29):14060-14066.
- [3] Yunhu He, Zhou Chen, Shangcheng Kong, Zhengyi Mao, Chen Yang, Wanying Wang, Lei Wan, Guo Liu, Jianan Yin, Chi Hou Chan, Jian Lu. Light-controlled multifunctional reconfigurable structures, *Applied Materials Today*, 2022,26, 101393.
- [4] Aksu Z, Sahin C H, Alanyalioglu M. Fabrication of Janus GO/rGO humidity actuator by one-step electrochemical reduction route[J]. *Sensors and Actuators, B. Chemical*, 2022(354-):354.
